# Supplementary material
Source: HighWire-hosted journal article supplement (https://bmjmedicine.bmj.com/content/3/1/e000624)
Supplement: inline-supplementary-material-1 [file inline-supplementary-material-1.pdf]

## Supplementary material

**Title:** Socioeconomic inequalities in the risk of infection with SARS-CoV-2 Delta and Omicron variants in United Kingdom, 2020-22

**Authors:** Cameron Razieh<sup>1,2,3</sup>, Sharmin Shabnam<sup>1,3</sup>, Hajira Dambha-Miller<sup>4</sup>, Eva JA Morris<sup>5</sup>, Tom Yates<sup>1,2</sup>, Yogini V Chudasama<sup>1,3</sup>, Francesco Zaccardi<sup>1,3</sup>, Clare L Gillies<sup>1,3</sup>, Amitava Banerjee<sup>6</sup>, Manish Pareek<sup>7,8</sup>, Ben Lacey<sup>5</sup>, Martin White<sup>9</sup>, Kamlesh Khunti<sup>1,3</sup>, Nazrul Islam<sup>4,5</sup>

1. Diabetes Research Centre, University of Leicester, Leicester General Hospital, Leicester, LE5 4PW, UK.
2. National Institute for Health Research (NIHR) Leicester Biomedical Research Centre (BRC), Leicester General Hospital, Leicester, LE5 4PW, UK.
3. Leicester Real World Evidence Unit, Diabetes Research Centre, University of Leicester, Leicester, UK.
4. Primary Care Research Centre, University of Southampton
5. Nuffield Department of Population Health, Big Data Institute, University of Oxford, Oxford, UK.
6. Institute of Health Informatics, University College London, London, UK
7. Department of Respiratory Sciences, University of Leicester, Leicester, UK
8. Department of Infection and HIV Medicine, University Hospitals Leicester NHS Trust, Leicester, UK
9. MRC Epidemiology Unit, University of Cambridge, UK

## Table of Contents

|                                                                                                                                                                                                    |    |
|----------------------------------------------------------------------------------------------------------------------------------------------------------------------------------------------------|----|
| <b>Supplementary Table 1.</b> Count and crude percentage of participants testing compatible with the Delta and Omicron variant, by IMD deciles and occupation sector. ....                         | 3  |
| <b>Supplementary Table 2.</b> Crude incidence rate of testing compatible with the Delta variant by IMD, and by IMD decile and sex. ....                                                            | 4  |
| <b>Supplementary Table 3.</b> Crude incidence rate of testing compatible with the Omicron variant by IMD decile, and by IMD decile and sex. ....                                                   | 5  |
| <b>Supplementary Table 4.</b> Association between deprivation and Delta and Omicron variant using multilevel Poisson regression model and random-effects at country level. ....                    | 6  |
| <b>Supplementary Table 5.</b> Association between deprivation and Delta and Omicron variant using multilevel Poisson regression model and second-order polynomial for age and time variables. .... | 7  |
| <b>Supplementary Figure 1.</b> Occupational groups or employment sectors in the survey questionnaire. .                                                                                            | 8  |
| <b>Supplementary Figure 2.</b> Association between deprivation and Delta variant. ....                                                                                                             | 9  |
| <b>Supplementary Figure 3.</b> Association between deprivation and Omicron variant. ....                                                                                                           | 10 |

**Supplementary Table 1.** Count and crude percentage of participants testing compatible with the Delta and Omicron variant, by IMD deciles and occupation sector.

| IMD                 | Delta cohort (02.07.2020–19.12.2021)    |                |            |                |         |                |                        |                |
|---------------------|-----------------------------------------|----------------|------------|----------------|---------|----------------|------------------------|----------------|
|                     | Manufacturing and construction          |                | Healthcare |                | Retail  |                | Teaching and education |                |
|                     | Total N                                 | Positive n (%) | Total N    | Positive n (%) | Total N | Positive n (%) | Total N                | Positive n (%) |
| 1 (most deprived)   | 966                                     | 90 (9.3)       | 1225       | 95 (7.8)       | 1097    | 83 (7.6)       | 1098                   | 93 (8.5)       |
| 2                   | 1579                                    | 111 (7.0)      | 1846       | 104 (5.6)      | 1422    | 103 (7.2)      | 1861                   | 140 (7.5)      |
| 3                   | 1769                                    | 144 (8.1)      | 2223       | 110 (4.9)      | 1519    | 75 (4.9)       | 2433                   | 197 (8.1)      |
| 4                   | 2127                                    | 142 (6.7)      | 2452       | 131 (5.3)      | 1675    | 92 (5.5)       | 2793                   | 214 (7.7)      |
| 5                   | 2424                                    | 168 (6.9)      | 2750       | 145 (5.3)      | 1708    | 95 (5.6)       | 3112                   | 245 (7.9)      |
| 6                   | 2656                                    | 163 (6.1)      | 2844       | 132 (4.6)      | 1828    | 109 (6.0)      | 3535                   | 279 (7.9)      |
| 7                   | 2660                                    | 156 (5.9)      | 3167       | 154 (4.9)      | 1842    | 112 (6.1)      | 3586                   | 258 (7.2)      |
| 8                   | 3052                                    | 191 (6.3)      | 3292       | 166 (5.0)      | 1878    | 120 (6.4)      | 4060                   | 307 (7.6)      |
| 9                   | 3149                                    | 228 (7.2)      | 3497       | 145 (4.1)      | 1955    | 115 (5.9)      | 4334                   | 348 (8.0)      |
| 10 (least deprived) | 2981                                    | 185 (6.2)      | 3552       | 178 (5.0)      | 1794    | 110 (6.1)      | 4550                   | 324 (7.1)      |
| IMD                 | Omicron cohort (on or after 20.12.2021) |                |            |                |         |                |                        |                |
|                     | Manufacturing and construction          |                | Healthcare |                | Retail  |                | Teaching and education |                |
|                     | Total N                                 | Positive n (%) | Total N    | Positive n (%) | Total N | Positive n (%) | Total N                | Positive n (%) |
| 1 (most deprived)   | 759                                     | 60 (7.9)       | 920        | 80 (8.7)       | 841     | 61 (7.3)       | 867                    | 68 (7.8)       |
| 2                   | 1189                                    | 93 (7.8)       | 1360       | 95 (7.0)       | 987     | 76 (7.7)       | 1465                   | 111 (7.6)      |
| 3                   | 1322                                    | 77 (5.8)       | 1621       | 94 (5.8)       | 1135    | 70 (6.2)       | 1914                   | 139 (7.3)      |
| 4                   | 1590                                    | 101 (6.4)      | 1873       | 139 (7.4)      | 1264    | 62 (4.9)       | 2192                   | 128 (5.8)      |
| 5                   | 1844                                    | 108 (5.9)      | 2097       | 123 (5.9)      | 1293    | 82 (6.3)       | 2553                   | 161 (6.3)      |
| 6                   | 2010                                    | 126 (6.3)      | 2221       | 137 (6.2)      | 1368    | 75 (5.5)       | 2910                   | 191 (6.6)      |
| 7                   | 2114                                    | 101 (4.8)      | 2449       | 130 (5.3)      | 1424    | 65 (4.6)       | 2956                   | 168 (5.7)      |
| 8                   | 2400                                    | 135 (5.6)      | 2585       | 128 (5.0)      | 1458    | 80 (5.5)       | 3377                   | 204 (6.0)      |
| 9                   | 2447                                    | 150 (6.1)      | 2778       | 167 (6.0)      | 1464    | 77 (5.3)       | 3639                   | 209 (5.7)      |
| 10 (least deprived) | 2379                                    | 153 (6.4)      | 2836       | 150 (5.3)      | 1394    | 76 (5.5)       | 3829                   | 191 (5.0)      |

**Supplementary Table 2.** Crude incidence rate of testing compatible with the Delta variant by IMD, and by IMD decile and sex.

| IMD, deciles               | Incidence Rate per 1000 person months (95% CI) |                   |                   |
|----------------------------|------------------------------------------------|-------------------|-------------------|
|                            | Overall                                        | Male              | Female            |
| <b>1 (most deprived)</b>   | 4.33 (4.09, 4.58)                              | 4.46 (4.10, 4.84) | 4.22 (3.91, 4.56) |
| <b>2</b>                   | 3.57 (3.39, 3.76)                              | 3.49 (3.23, 3.78) | 3.63 (3.39, 3.89) |
| <b>3</b>                   | 3.52 (3.36, 3.69)                              | 3.81 (3.55, 4.07) | 3.28 (3.07, 3.51) |
| <b>4</b>                   | 3.41 (3.26, 3.57)                              | 3.47 (3.24, 3.71) | 3.35 (3.15, 3.57) |
| <b>5</b>                   | 3.31 (3.17, 3.46)                              | 3.50 (3.28, 3.73) | 3.16 (2.97, 3.36) |
| <b>6</b>                   | 3.32 (3.18, 3.47)                              | 3.58 (3.36, 3.80) | 3.11 (2.93, 3.30) |
| <b>7</b>                   | 3.22 (3.08, 3.36)                              | 3.24 (3.05, 3.46) | 3.20 (3.02, 3.39) |
| <b>8</b>                   | 3.24 (3.11, 3.38)                              | 3.37 (3.17, 3.57) | 3.14 (2.97, 3.32) |
| <b>9</b>                   | 3.34 (3.21, 3.47)                              | 3.60 (3.40, 3.81) | 3.12 (2.95, 3.30) |
| <b>10 (least deprived)</b> | 3.18 (3.05, 3.31)                              | 3.27 (3.09, 3.47) | 3.09 (2.93, 3.27) |

**Supplementary Table 3.** Crude incidence rate of testing compatible with the Omicron variant by IMD decile, and by IMD decile and sex.

| IMD, deciles               | Incidence Rate per 1000 person months (95% CI) |                      |                      |
|----------------------------|------------------------------------------------|----------------------|----------------------|
|                            | Overall                                        | Male                 | Female               |
| <b>1 (most deprived)</b>   | 76.67 (71.60, 82.11)                           | 79.45 (71.78, 87.93) | 74.50 (67.89, 81.74) |
| <b>2</b>                   | 74.11 (69.82, 78.66)                           | 76.56 (70.07, 83.65) | 72.19 (66.60, 78.25) |
| <b>3</b>                   | 65.41 (61.72, 69.33)                           | 65.95 (60.44, 71.97) | 64.99 (60.12, 70.25) |
| <b>4</b>                   | 67.53 (64.02, 71.24)                           | 68.15 (62.90, 73.84) | 67.05 (62.40, 72.04) |
| <b>5</b>                   | 64.53 (61.24, 67.99)                           | 68.50 (63.43, 73.98) | 61.47 (57.24, 66.01) |
| <b>6</b>                   | 61.90 (58.84, 65.12)                           | 59.99 (55.52, 64.82) | 63.42 (59.30, 67.82) |
| <b>7</b>                   | 55.23 (52.42, 58.20)                           | 55.27 (51.07, 59.81) | 55.21 (51.48, 59.20) |
| <b>8</b>                   | 59.99 (57.14, 62.99)                           | 59.67 (55.45, 64.20) | 60.26 (56.45, 64.33) |
| <b>9</b>                   | 58.03 (55.31, 60.89)                           | 58.73 (54.68, 63.08) | 57.47 (53.86, 61.33) |
| <b>10 (least deprived)</b> | 54.52 (51.93, 57.24)                           | 54.55 (50.74, 58.65) | 54.49 (51.02, 58.20) |

**Supplementary Table 4.** Association between deprivation and Delta and Omicron variant using multilevel Poisson regression model and random-effects at country level.

| IMD, deciles               | Delta cohort; N=329,356 |         | Omicron cohort; N=246,061 |         |
|----------------------------|-------------------------|---------|---------------------------|---------|
|                            | IRR (95% CI)            | P value | IRR (95% CI)              | P value |
| <b>1 (most deprived)</b>   | 1.37 (1.33, 1.42)       | <0.0001 | 1.34 (1.31, 1.37)         | <0.0001 |
| <b>2</b>                   | 1.18 (1.13, 1.23)       | <0.0001 | 1.28 (1.24, 1.32)         | <0.0001 |
| <b>3</b>                   | 1.19 (1.12, 1.26)       | <0.0001 | 1.14 (1.11, 1.18)         | <0.0001 |
| <b>4</b>                   | 1.12 (1.07, 1.17)       | <0.0001 | 1.21 (1.17, 1.25)         | <0.0001 |
| <b>5</b>                   | 1.10 (1.03, 1.17)       | 0.003   | 1.19 (1.15, 1.22)         | <0.0001 |
| <b>6</b>                   | 1.09 (1.05, 1.13)       | <0.0001 | 1.15 (1.09, 1.22)         | <0.0001 |
| <b>7</b>                   | 1.07 (1.06, 1.08)       | <0.0001 | 1.04 (1.02, 1.06)         | 0.001   |
| <b>8</b>                   | 1.07 (1.05, 1.09)       | <0.0001 | 1.12 (1.07, 1.18)         | <0.0001 |
| <b>9</b>                   | 1.09 (1.07, 1.10)       | <0.0001 | 1.08 (1.06, 1.1)          | <0.0001 |
| <b>10 (least deprived)</b> | Reference               |         |                           |         |

IRR = incident rate ratio

\*Adjusted for age, sex, ethnicity, urban/rural, comorbid conditions, household size, patient/client-facing nature of the job, and time (as the quarter of the year) in the multilevel Poisson regression model using random-effects at country level.

**Supplementary Table 5.** Association between deprivation and Delta and Omicron variant using multilevel Poisson regression model and second-order polynomial for age and time variables.

| IMD, deciles               | Delta cohort; N=329,356 |         | Omicron cohort; N=246,061 |         |
|----------------------------|-------------------------|---------|---------------------------|---------|
|                            | IRR (95% CI)            | P value | IRR (95% CI)              | P value |
| <b>1 (most deprived)</b>   | 1.39 (1.30, 1.48)       | <0.0001 | 1.34 (1.23, 1.45)         | <0.0001 |
| <b>2</b>                   | 1.19 (1.12, 1.27)       | <0.0001 | 1.27 (1.18, 1.37)         | <0.0001 |
| <b>3</b>                   | 1.21 (1.14, 1.28)       | <0.0001 | 1.14 (1.05, 1.22)         | 0.001   |
| <b>4</b>                   | 1.13 (1.07, 1.20)       | <0.0001 | 1.20 (1.12, 1.29)         | <0.0001 |
| <b>5</b>                   | 1.11 (1.05, 1.17)       | <0.0001 | 1.18 (1.10, 1.27)         | <0.0001 |
| <b>6</b>                   | 1.10 (1.04, 1.16)       | <0.0001 | 1.15 (1.07, 1.23)         | <0.0001 |
| <b>7</b>                   | 1.07 (1.02, 1.13)       | 0.007   | 1.03 (0.96, 1.11)         | 0.336   |
| <b>8</b>                   | 1.07 (1.02, 1.13)       | 0.008   | 1.12 (1.05, 1.20)         | 0.001   |
| <b>9</b>                   | 1.09 (1.04, 1.14)       | 0.001   | 1.07 (1.00, 1.15)         | 0.037   |
| <b>10 (least deprived)</b> | Reference               |         |                           |         |

IRR = incident rate ratio

\*Adjusted for age, sex, ethnicity, urban/rural, comorbid conditions, household size, patient/client-facing nature of the job, and time (as the quarter of the year) in the multilevel Poisson regression model using second-order polynomial for age and time variables.

**Supplementary Figure 1.** Occupational groups or employment sectors in the survey questionnaire.

3. *If currently working at all:* Has your main job/business changed since we last spoke to you?  Yes  No  
*If no, and not currently working, go to Section B. Otherwise, go to A6.*

*If yes:* (a) What is your job title in your main job/business now? \_\_\_\_\_

(b) And in this job/business, what do you mainly do now? \_\_\_\_\_

(c) Which of these employment sectors do you work in now? (*select one*)

|                                                                          |                                                                            |
|--------------------------------------------------------------------------|----------------------------------------------------------------------------|
| <input type="checkbox"/> Teaching and education                          | <input type="checkbox"/> Health care ( <i>go to A4</i> )                   |
| <input type="checkbox"/> Social care ( <i>go to A5</i> )                 | <input type="checkbox"/> Transport (incl. storage, logistic)               |
| <input type="checkbox"/> Retail sector (incl. wholesale)                 | <input type="checkbox"/> Hospitality (e.g. hotel, restaurant, cafe)        |
| <input type="checkbox"/> Food production and agriculture (incl. farming) | <input type="checkbox"/> Personal services (e.g. hairdressers, tattooists) |
| <input type="checkbox"/> Information technology and communication        | <input type="checkbox"/> Financial services (incl. insurance)              |
| <input type="checkbox"/> Manufacturing or construction                   | <input type="checkbox"/> Civil service or Local Government                 |
| <input type="checkbox"/> Armed forces                                    | <input type="checkbox"/> Arts, entertainment or recreation                 |
| <input type="checkbox"/> Other employment sector, specify _____          | ( <i>go to A6 if not now working in Health or Social care</i> )            |



**Supplementary Figure 2.** Association between deprivation and Delta variant.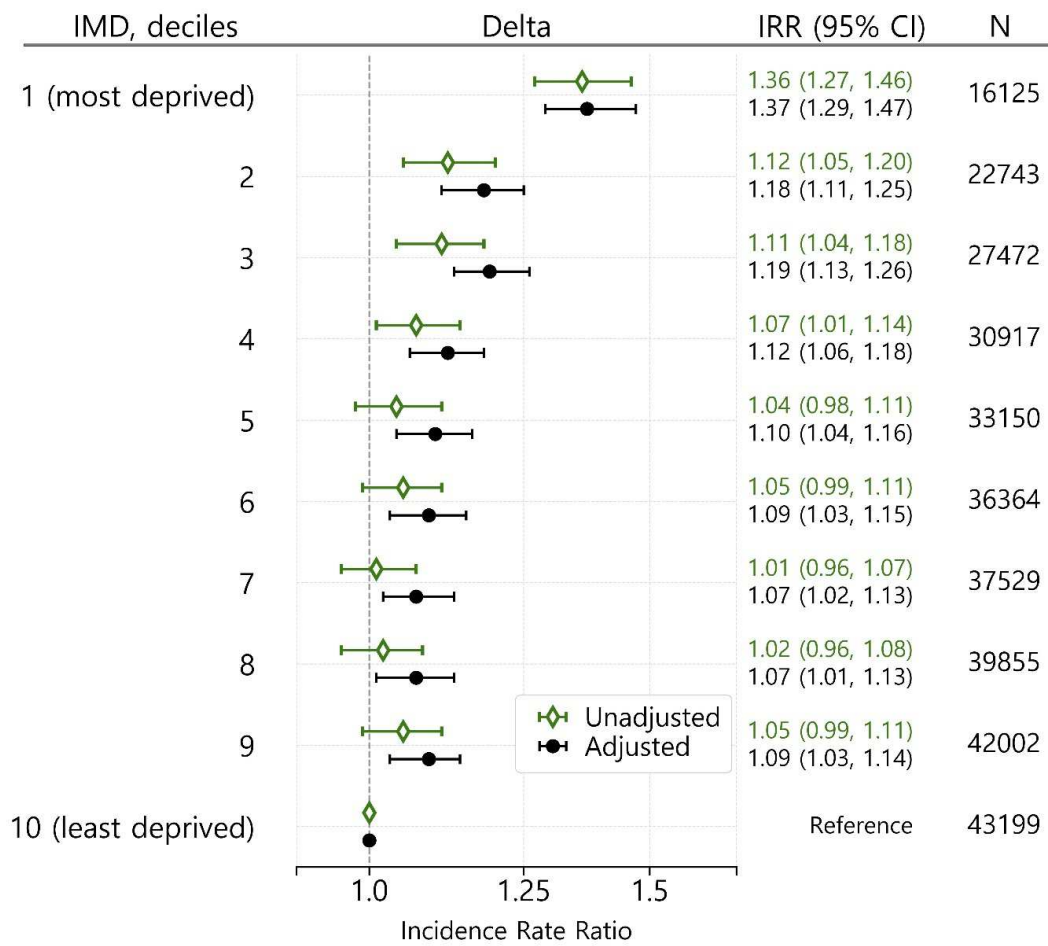

\*Adjusted for age, sex, ethnicity, urban/rural, comorbid conditions, household size, patient/client-facing nature of the job, country, and time (as quarters of the year).

**Supplementary Figure 3.** Association between deprivation and Omicron variant.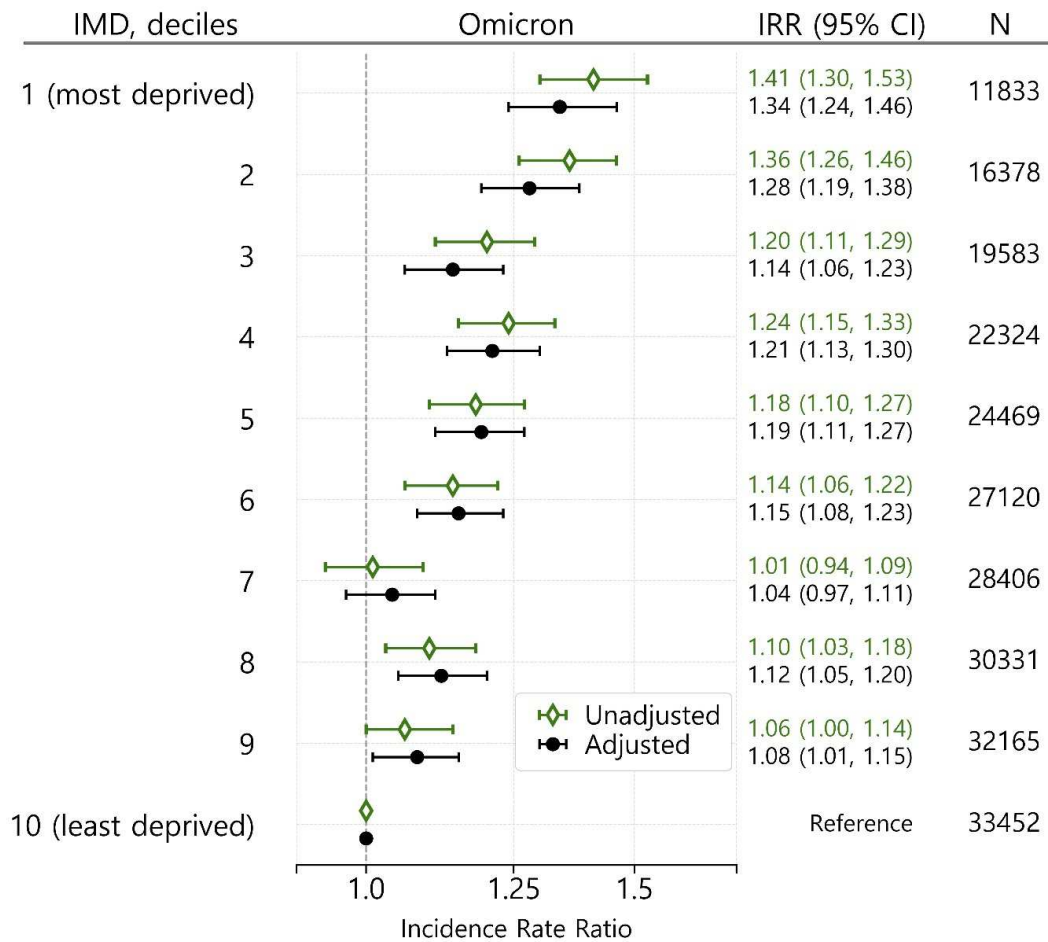

\*Adjusted for age, sex, ethnicity, urban/rural, comorbid conditions, household size, patient/client-facing nature of the job, country, and time (as quarters of the year).
